# Supplementary material for: Highly symmetric spongy porous poly(ether sulfone) membranes with selective open-cells for vanadium flow battery application
Source: Royal Society of Chemistry journal article supplement (doi:10.1039/c6ra18587h), 2016-01-01
Supplement: c6ra18587h1.pdf [file c6ra18587h1.pdf]

## Highly Symmetric Spongy Porous Poly (ether sulfone) Membranes with Selective Open-cell for Vanadium Flow Battery Application

Dongju Chen<sup>a\*</sup>, Dandan Li<sup>a</sup> and Xianfeng Li<sup>b\*</sup>

<sup>a</sup>School of Chemistry and Chemical Engineering, Liaoning Normal University, Huanghe Road 850, Dalian 116029, Email: [dongju.chen@yahoo.com](mailto:dongju.chen@yahoo.com).

<sup>b</sup>Division of Energy storage, Dalian Institute of Chemical Physics, Chinese Academy of Science, Zhongshan Road 457, Dalian 116023, Email: [lixianfeng@dicp.ac.cn](mailto:lixianfeng@dicp.ac.cn).

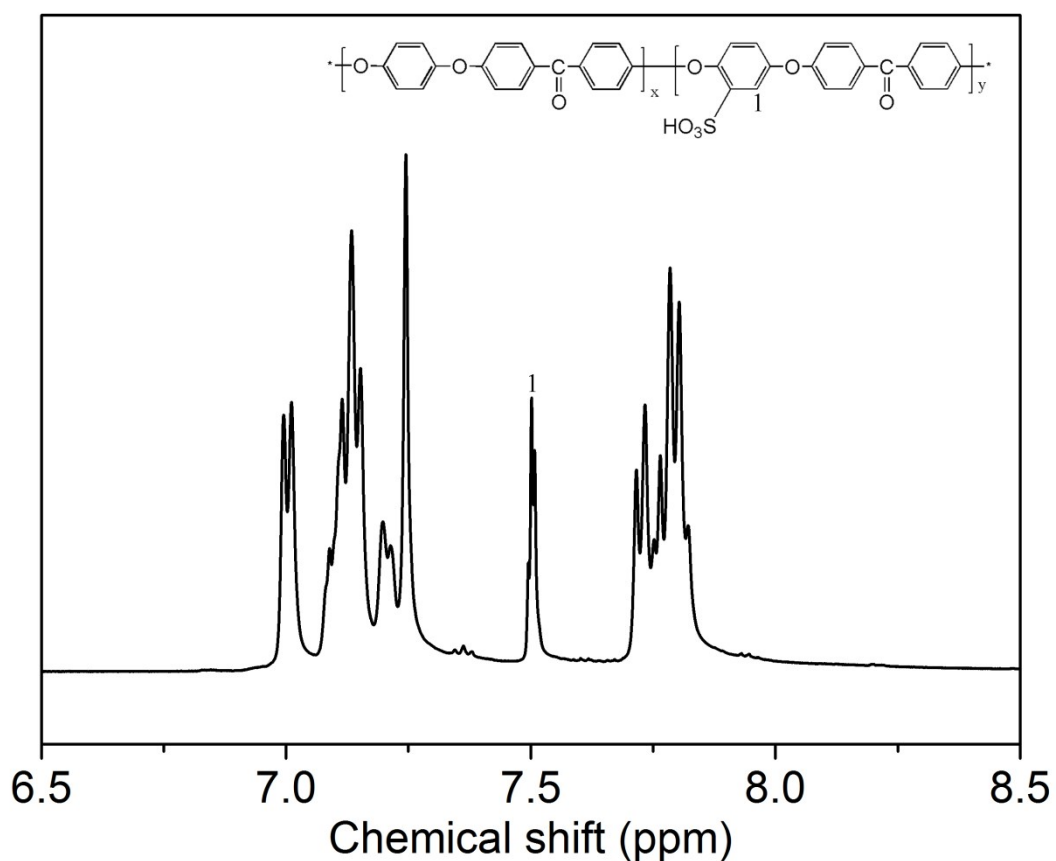

**Fig. S1** The molecular structure and <sup>1</sup>H NMR of the SPEEK membrane.

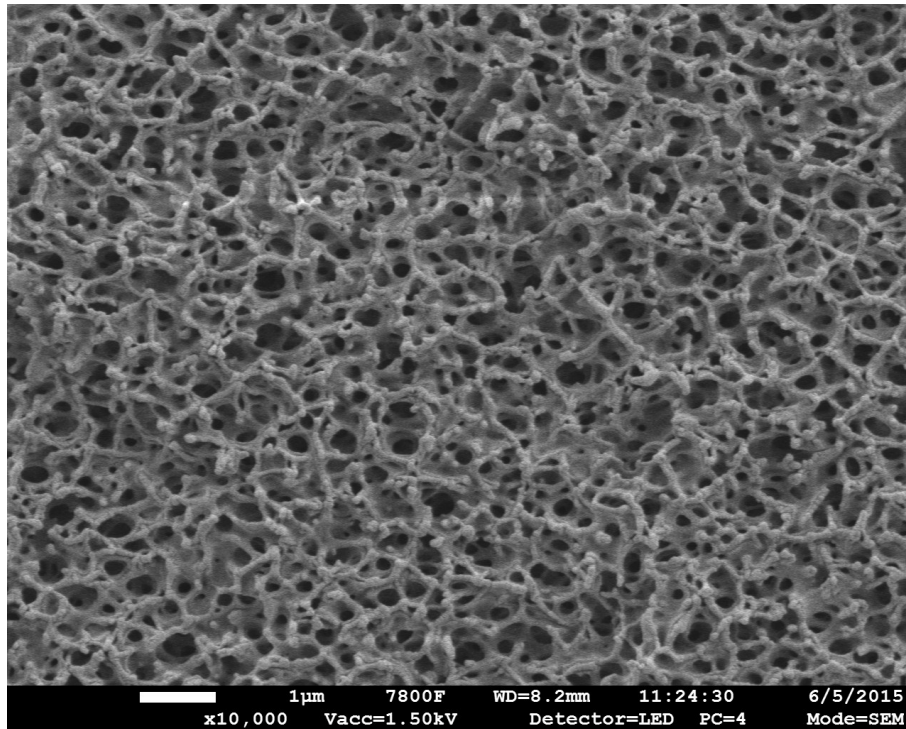

**Fig. S2** High magnification SEM of membrane cross section after cycle test.
